# Supplementary material for: Fe3+-Coordination mediated synergistic dual-network conductive hydrogel as a sensitive and highly-stretchable strain sensor with adjustable mechanical properties
Source: Royal Society of Chemistry journal article supplement (doi:10.1039/d1tb02199k), 2022-01-01
Supplement: d1tb02199k1.pdf [file d1tb02199k1.pdf]

## Supporting Information

### **Fe<sup>3+</sup>-coordination Mediated Synergistic Dual-network Conductive Hydrogel as Sensitive and Highly-stretchable Strain Sensor with Adjustable Mechanical Properties**

Xueying Sun, Haixiao Wang, Yi Ding, Yuanqing Yao, Yaqing Liu, Jun Tang\*

Department of Polymer Science, College of Chemistry, Jilin University, Changchun 130012, China

\*Corresponding author.

Email: [chemjtang@jlu.edu.cn](mailto:chemjtang@jlu.edu.cn).

Tel./Fax: +86-431-88498179.

**Table S1** The ratio of components

| AAm | AA   | $\beta$ -CD | H <sub>2</sub> O | FeCl <sub>3</sub> ·6H <sub>2</sub> O | ANI in           | HCl in         | Sample                                      |
|-----|------|-------------|------------------|--------------------------------------|------------------|----------------|---------------------------------------------|
| (g) | (g)  | (g)         | (mL)             | (M)                                  | ANI-HCl<br>(wt%) | ANI-HCl<br>(M) |                                             |
| 4   | 1.12 | 1           | 11               | 0.1                                  | 3                | 0.12           | PANI-P(AAm-co-AA)@Fe <sup>3+</sup> (0.12 M) |
| 4   | 1.12 | 1           | 11               | 0.1                                  | 3                | 0.25           | PANI-P(AAm-co-AA)@Fe <sup>3+</sup> (0.25 M) |
| 4   | 1.12 | 1           | 11               | 0.1                                  | 3                | 0.39           | PANI-P(AAm-co-AA)@Fe <sup>3+</sup> (0.39 M) |
| 4   | 1.12 | 1           | 11               | 0.1                                  | 3                | 0.40           | PANI-P(AAm-co-AA)@Fe <sup>3+</sup> (0.40 M) |
| 4   | 1.12 | 1           | 11               | 0.1                                  | 3                | 0.41           | PANI-P(AAm-co-AA)@Fe <sup>3+</sup> (0.41 M) |
| 4   | 1.12 | 1           | 11               | 0.1                                  | 3                | 0.42           | PANI-P(AAm-co-AA)@Fe <sup>3+</sup> (0.42 M) |
| 4   | 1.12 | 1           | 11               | 0.1                                  | 3                | 0.43           | PANI-P(AAm-co-AA)@Fe <sup>3+</sup> (0.43 M) |
| 4   | 1.12 | 1           | 11               | 0.1                                  | 3                | 0.5            | PANI-P(AAm-co-AA)@Fe <sup>3+</sup> (0.5 M)  |
| 4   | 1.12 | 1           | 11               | 0.1                                  | 3                | 1.0            | PANI-P(AAm-co-AA)@Fe <sup>3+</sup> (1.0 M)  |
| 4   | 1.12 | 1           | 11               | 0.1                                  | 3                | 1.5            | PANI-P(AAm-co-AA)@Fe <sup>3+</sup> (1.5 M)  |
| 4   | 1.12 | 1           | 11               | 0.1                                  | 3                | 2.0            | PANI-P(AAm-co-AA)@Fe <sup>3+</sup> (2.0 M)  |

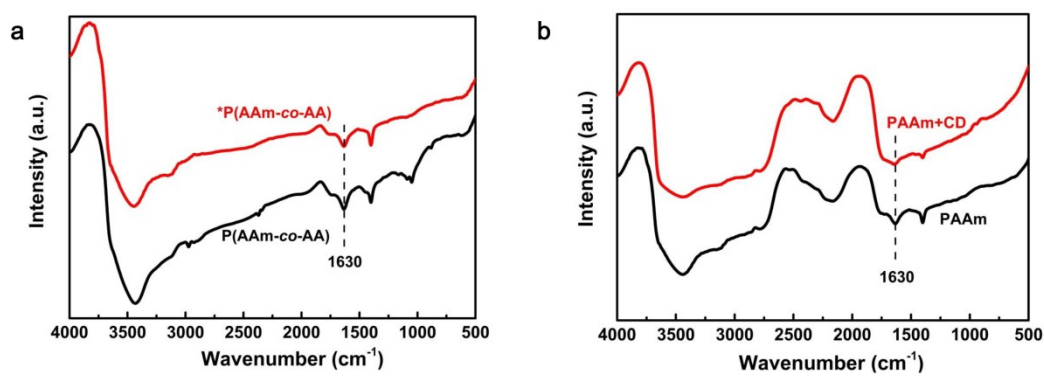

**Fig. S1** FTIR spectra of (a) P(AAm-co-AA) and \*P(AAm-co-AA), (b) PAAm and PAAm+β-CD.

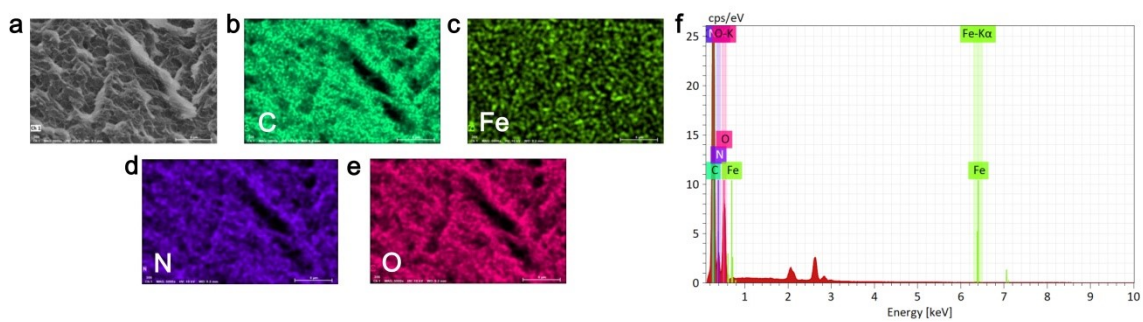

**Fig. S2** (a-e) SEM images of PANI-P(AAm-co-AA)@Fe<sup>3+</sup> with corresponding EDX elemental mapping images of C, Fe, O, N; (f) EDX spectrum of PANI-P(AAm-co-AA)@Fe<sup>3+</sup>.

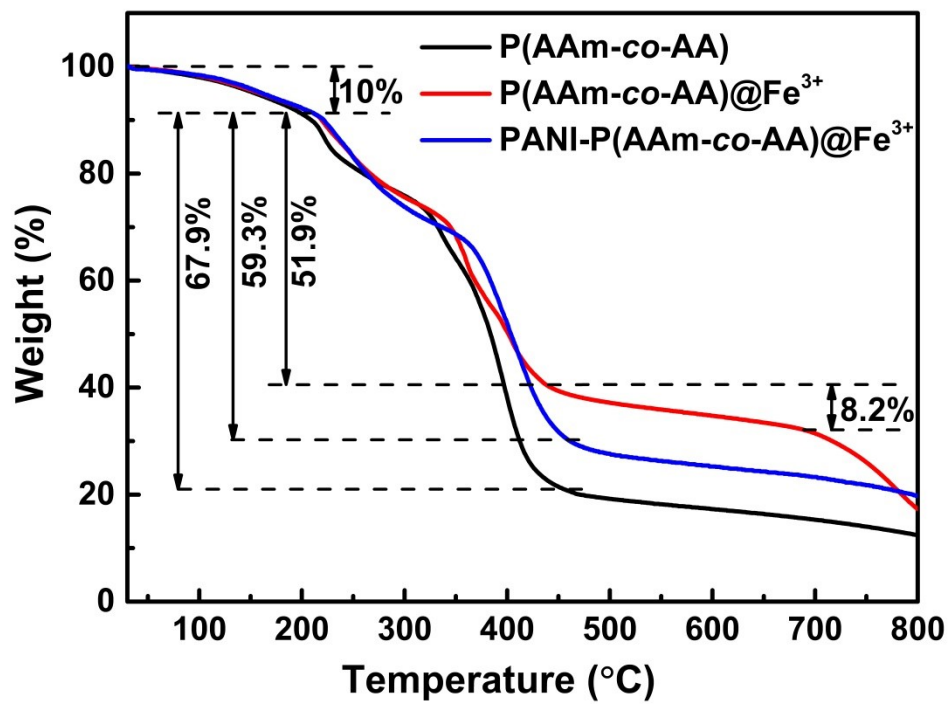

Fig. S3. TGA curves of P(AAm-co-AA), P(AAm-co-AA)@Fe<sup>3+</sup> and PANI-P(AAm-co-AA)@Fe<sup>3+</sup>.

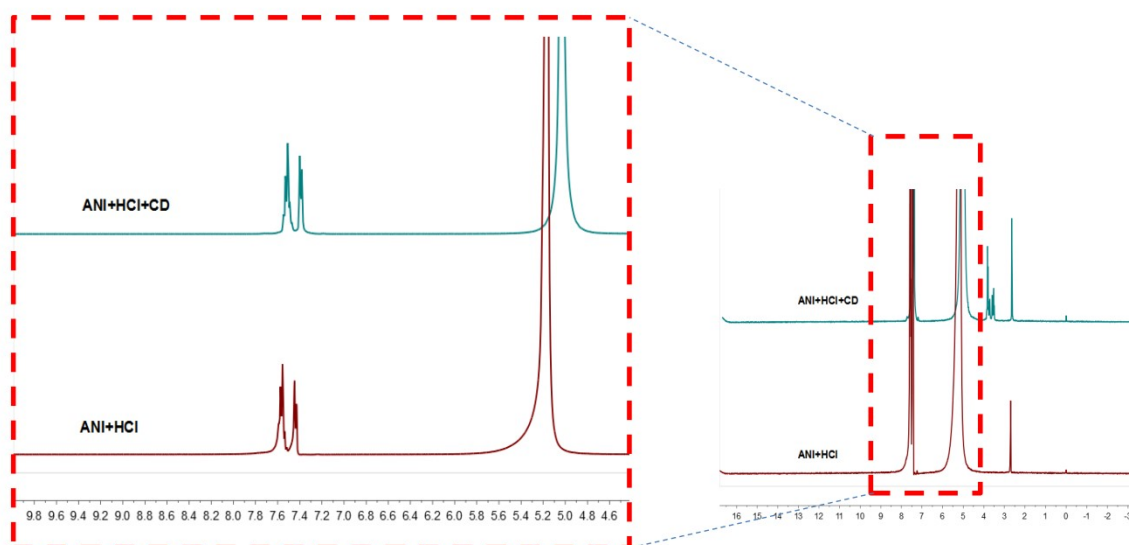

**Fig. S4** <sup>1</sup>H-NMR spectra of ANI and ANI+β-CD in HCl solution in D<sub>2</sub>O-DMSO (v/v=5:1) with tetramethylsilane (TMS) as the internal standard.

**Table S2** Phenomenon of PANI-P(AAm-co-AA)@Fe<sup>3+</sup> and solution when prepared at different acidity

for 24 h.

|                 | <b>2 M</b>                                             | <b>1.5 M</b>                                                | <b>1.0 M</b>                                             | <b>0.5 M</b>                                              | <b>0.25 M</b>                                | <b>0.12 M</b> |
|-----------------|--------------------------------------------------------|-------------------------------------------------------------|----------------------------------------------------------|-----------------------------------------------------------|----------------------------------------------|---------------|
| <b>Hydrogel</b> | Dark green and the gel becomes a viscous fluid rapidly | Dark green and the gel becomes a viscous fluid after 10 min | Dark green and the gel becomes a viscous fluid after 2 h | Dark green and the gel becomes a viscous fluid after 20 h | Dark green substance attached to the surface | Unchanged     |
| <b>Solution</b> | -                                                      | -                                                           | -                                                        | -                                                         | Faint yellow                                 | Unchanged     |

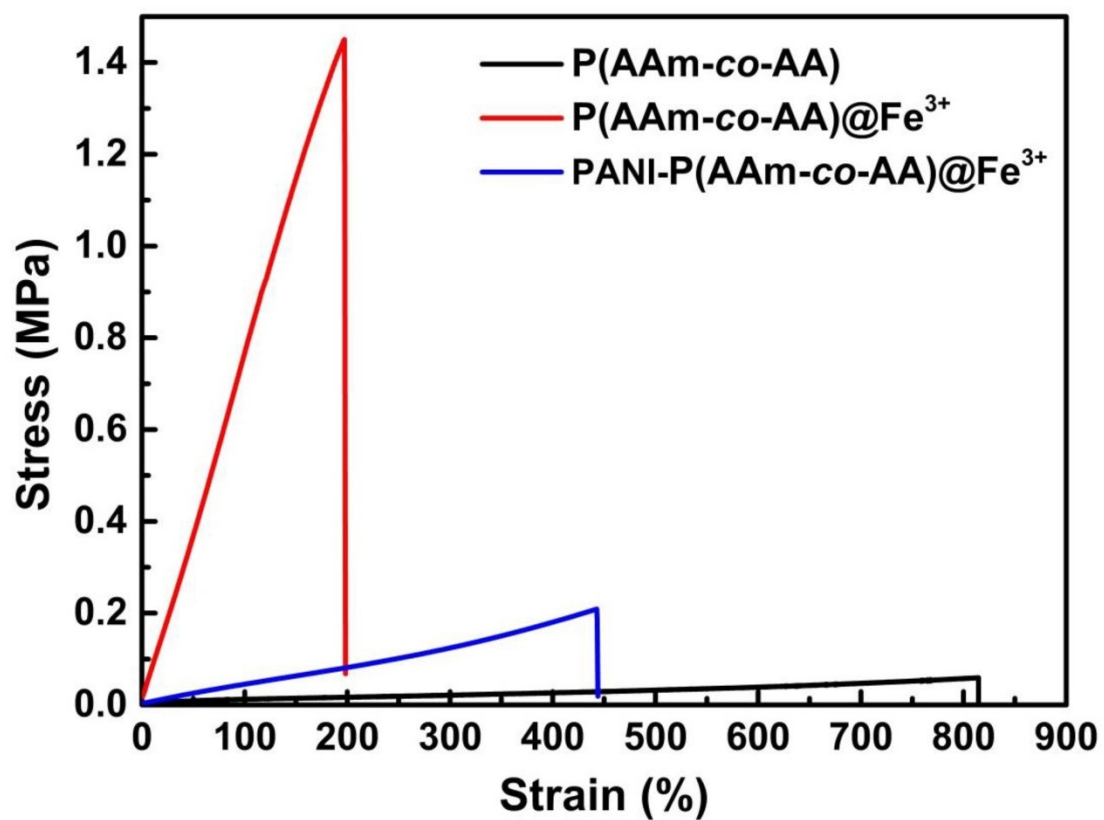

Fig. S5 Tensile strain curves of P(AAm-co-AA), P(AAm-co-AA)@Fe<sup>3+</sup> and PANI-P(AAm-co-AA)@Fe<sup>3+</sup>.



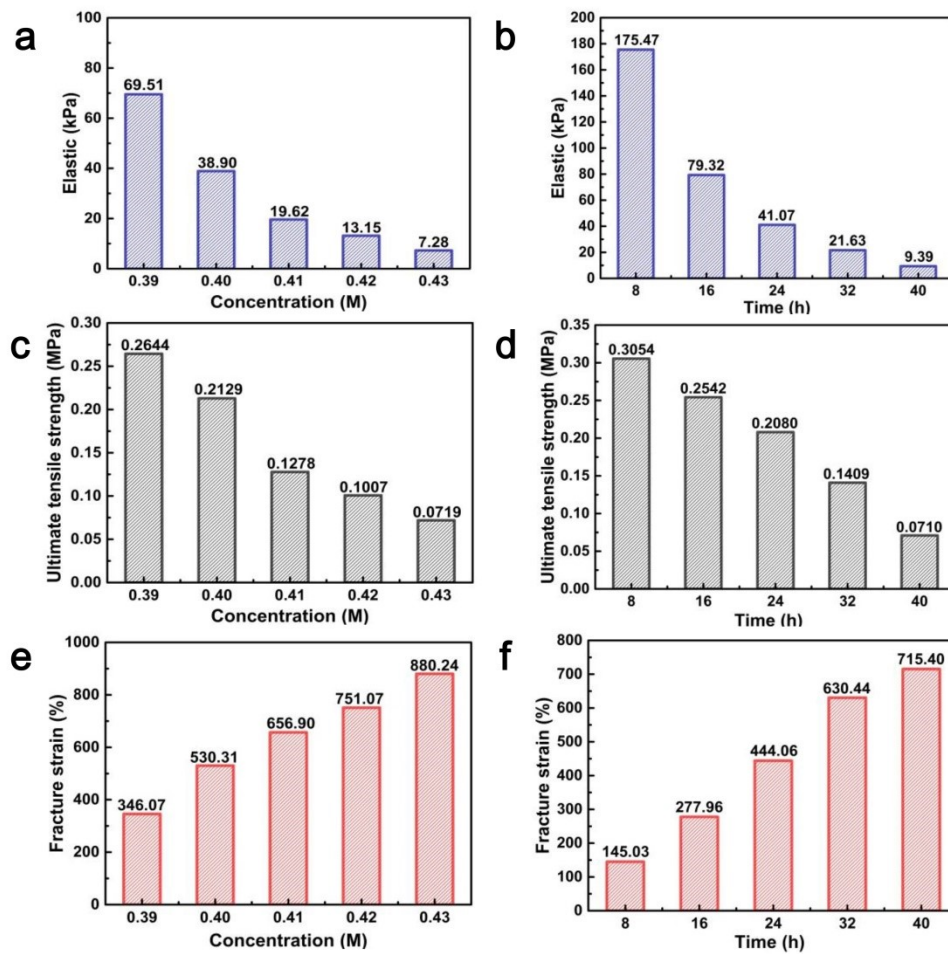

**Fig. S6** The elastic, ultimate tensile strength and fracture strain of (a, c, e) PANI-P(AAm-co-AA)@Fe<sup>3+</sup> prepared by oxidation in 3% ANI-HCl solution with different acidity for 24 h and (b, d, f) PANI-P(AAm-co-AA)@Fe<sup>3+</sup> prepared in 3% ANI-HCl solution with the acidity of 0.40 M for different oxidation time.

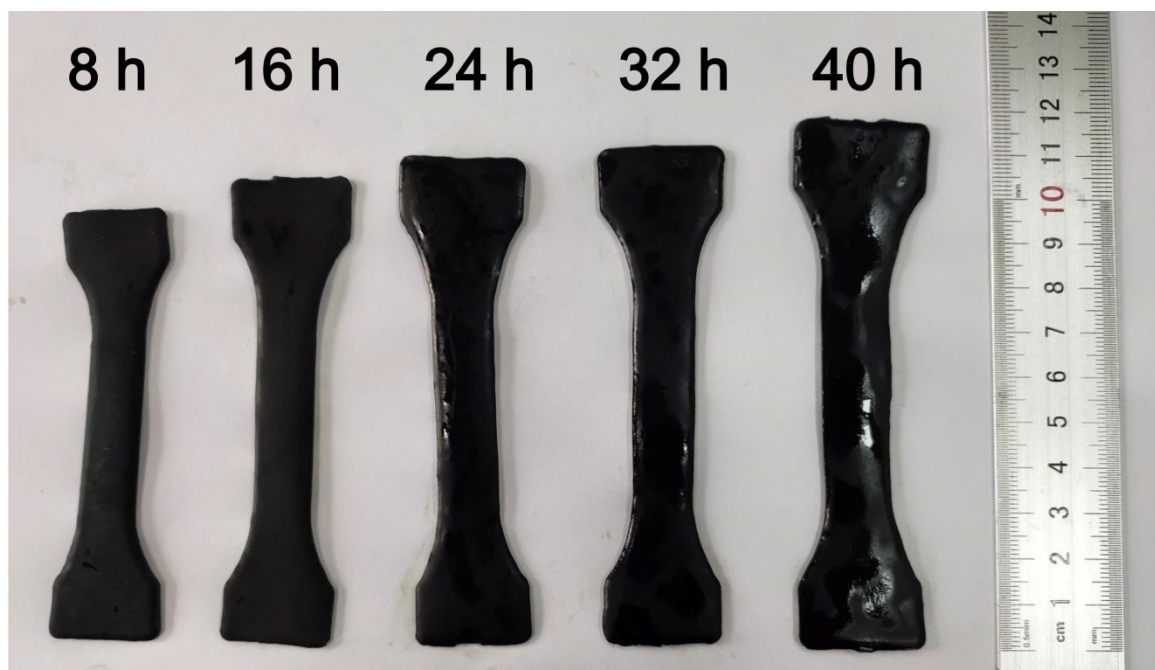

**Fig. S7** Changes in the appearance of PANI-P(AAm-co-AA)@Fe<sup>3+</sup> with different oxidation time.

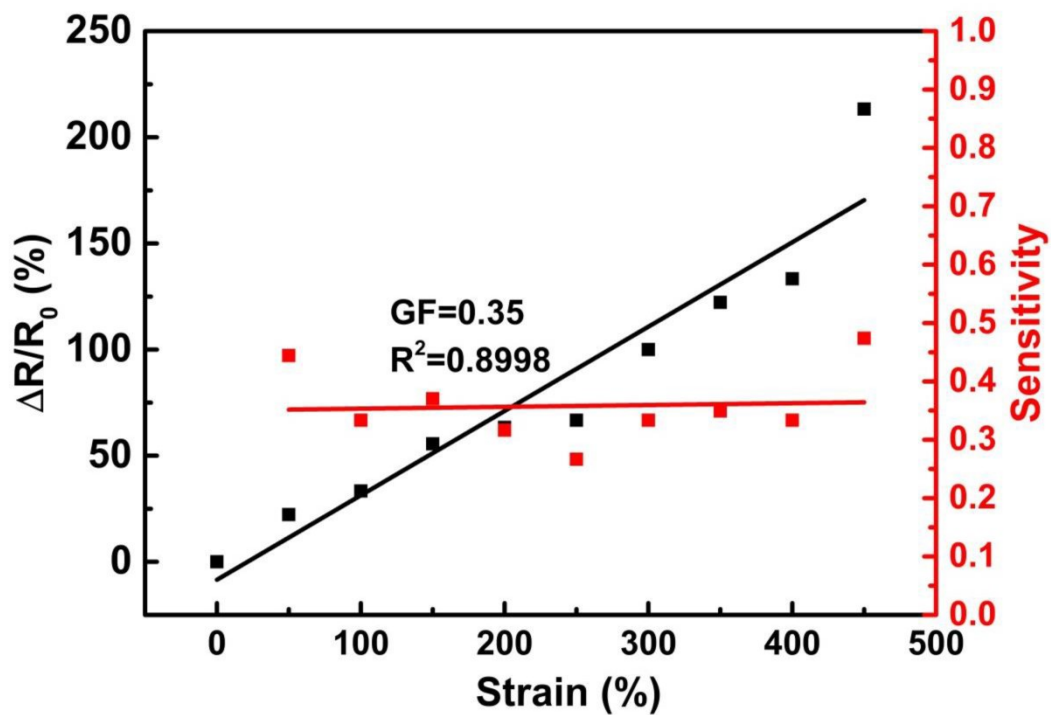

**Fig. S8** Relative resistance change ( $\Delta R/R_0$ ) and sensitivity of PANI-P(AAm-co-AA) $@Fe^{3+}$  (prepared in 3% ANI-HCl solution with the acidity of 0.39 M for 24 h) under strain.

**Table S3** Comparison of the performances of PANI-P(AAm-co-AA)@Fe<sup>3+</sup> and other PANI-based  
conductive hydrogel materials.

| <b>Materials</b>                       | <b>Sensing range</b>  | <b>Stress</b>       | <b>Gauge factor</b>                                             | <b>Reference</b> |
|----------------------------------------|-----------------------|---------------------|-----------------------------------------------------------------|------------------|
| PAAm-PANI hydrogel                     | <300%                 | 0.6 MPa             | 5.7 (low strain)<br>1.48 (40%-300%)                             | 1                |
| PAAm-CSM-PANI hydrogel                 | <85%<br>(Compression) | 6 MPa               | 0.35 (<1 kPa)<br>0.05 (1-10 kPa)<br>10 <sup>-5</sup> (>500 kPa) | 2                |
| PANI-PSS hydrogel                      | <300%                 | 4 kPa               | 0.034                                                           | 3                |
| PANI-PAA-Phytic acid hydrogel          | <400%                 | 1.6 MPa             | 0.116 (100%)<br>0.047 (100%-400%)                               | 4                |
| PVP/PVA/CNCs-Fe <sup>3+</sup> hydrogel | <200%                 | 0.25 MPa            | 0.478                                                           | 5                |
| APP hydrogel                           | <140%                 | 2.56 MPa            | 0.16 (0-100%)<br>0.39 (100%-130%)                               | 6                |
| BSP-PANI hydrogel                      | <525%                 | 0.218 MPa           | 0.85                                                            | 7                |
| PANI-P(AAm-co-AA)@Fe <sup>3+</sup>     | <715.4%               | 0.071-0.3054<br>MPa | 0.45                                                            | This Work        |

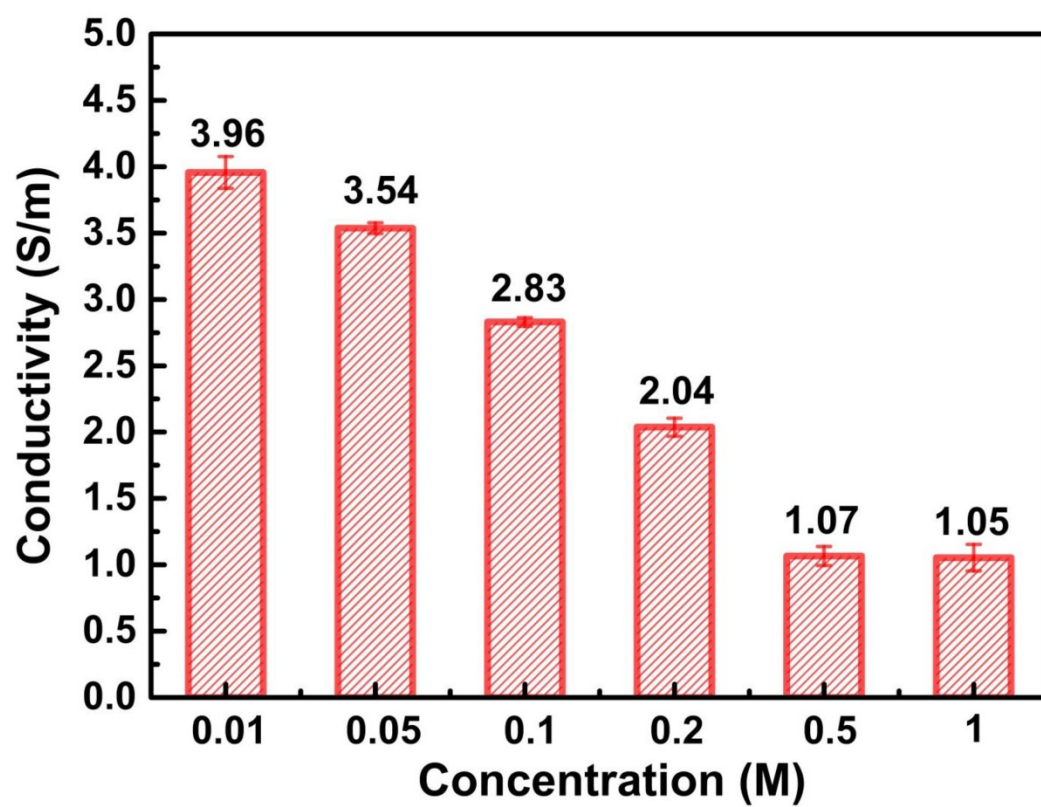

Fig. S9 Conductivity of PANI-P(AAm-co-AA)@Fe<sup>3+</sup> prepared with different Fe<sup>3+</sup> concentration.

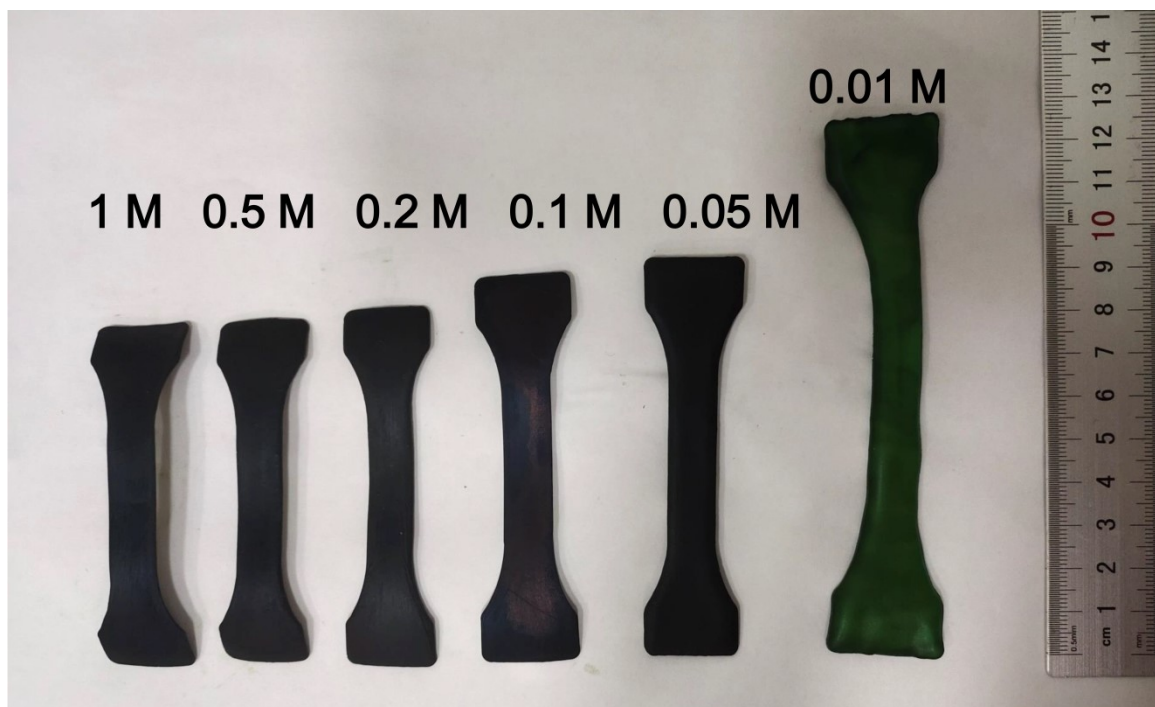

**Fig. S10** Photo of PANI-P(AAm-co-AA)@Fe<sup>3+</sup> prepared with different Fe<sup>3+</sup> concentration.

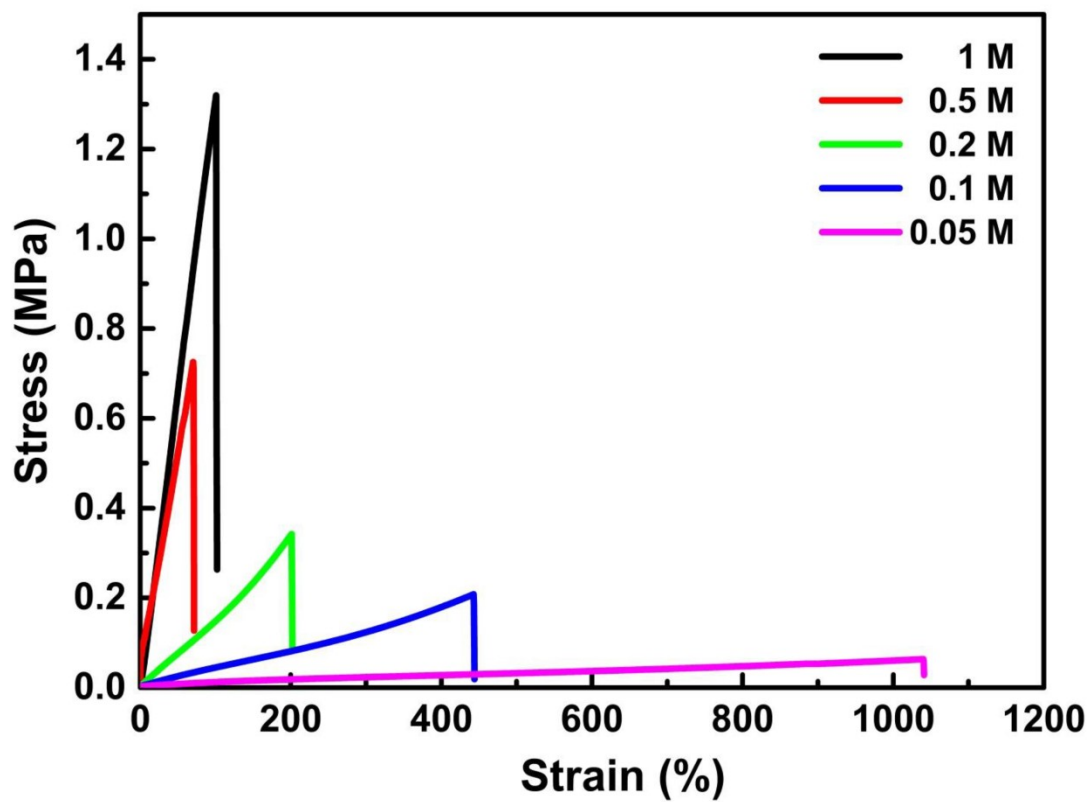

Fig. S11 Tensile curves of PANI-P(AAm-co-AA)@Fe<sup>3+</sup> prepared with different Fe<sup>3+</sup> concentration.

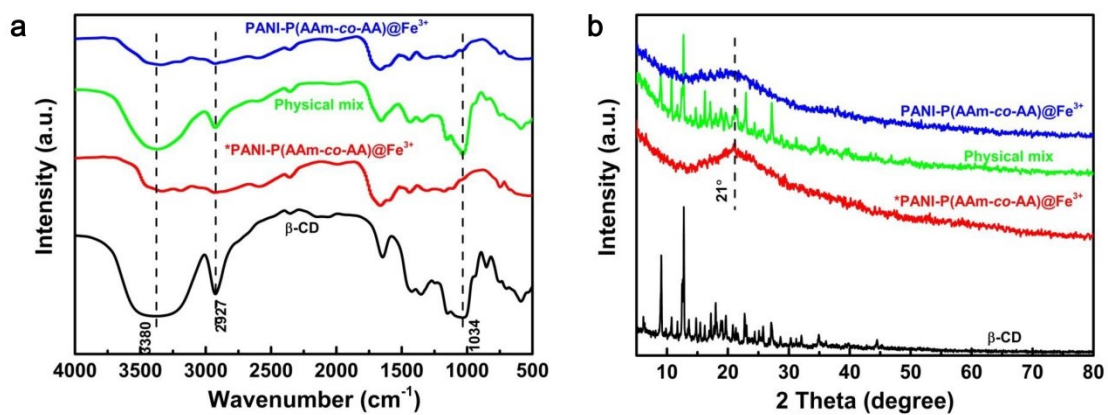

**Fig. S12** (a) Infrared spectra of β-CD, \*PANI-P(AAm-co-AA)@Fe<sup>3+</sup>, physical mixture of \*PANI-P(AAm-co-AA)@Fe<sup>3+</sup> and β-CD and PANI-P(AAm-co-AA)@Fe<sup>3+</sup>; (b) XRD patterns of β-CD, \*PANI-P(AAm-co-AA)@Fe<sup>3+</sup>, physical mixture of \*PANI-P(AAm-co-AA)@Fe<sup>3+</sup> and β-CD and PANI-P(AAm-co-AA)@Fe<sup>3+</sup>.



a

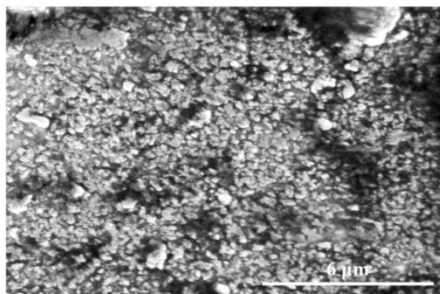

b

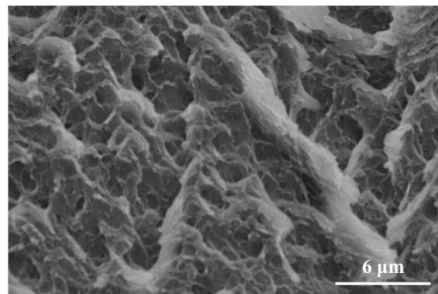

**Fig. S13** SEM images of (a) \*PANI-P(AAm-co-AA)@Fe<sup>3+</sup> and (b) PANI-P(AAm-co-AA)@Fe<sup>3+</sup>.

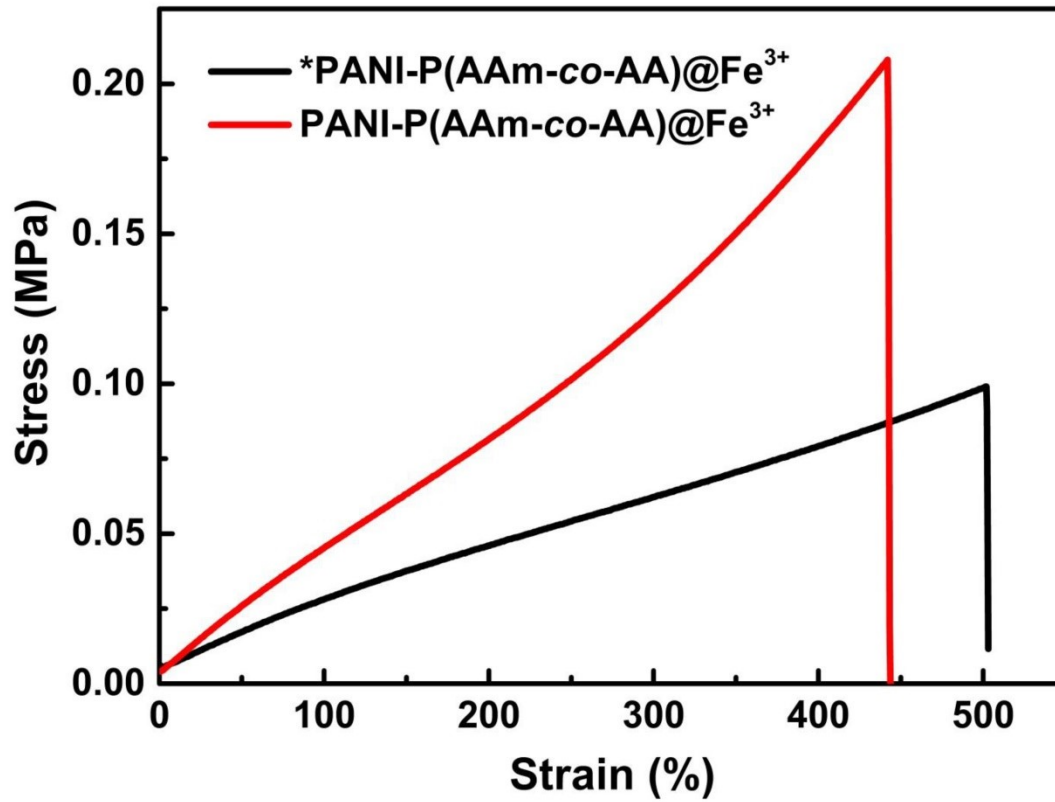

Fig. S14 Tensile curves of PANI-P(AAm-co-AA)@Fe<sup>3+</sup> and \*PANI-P(AAm-co-AA)@Fe<sup>3+</sup>.

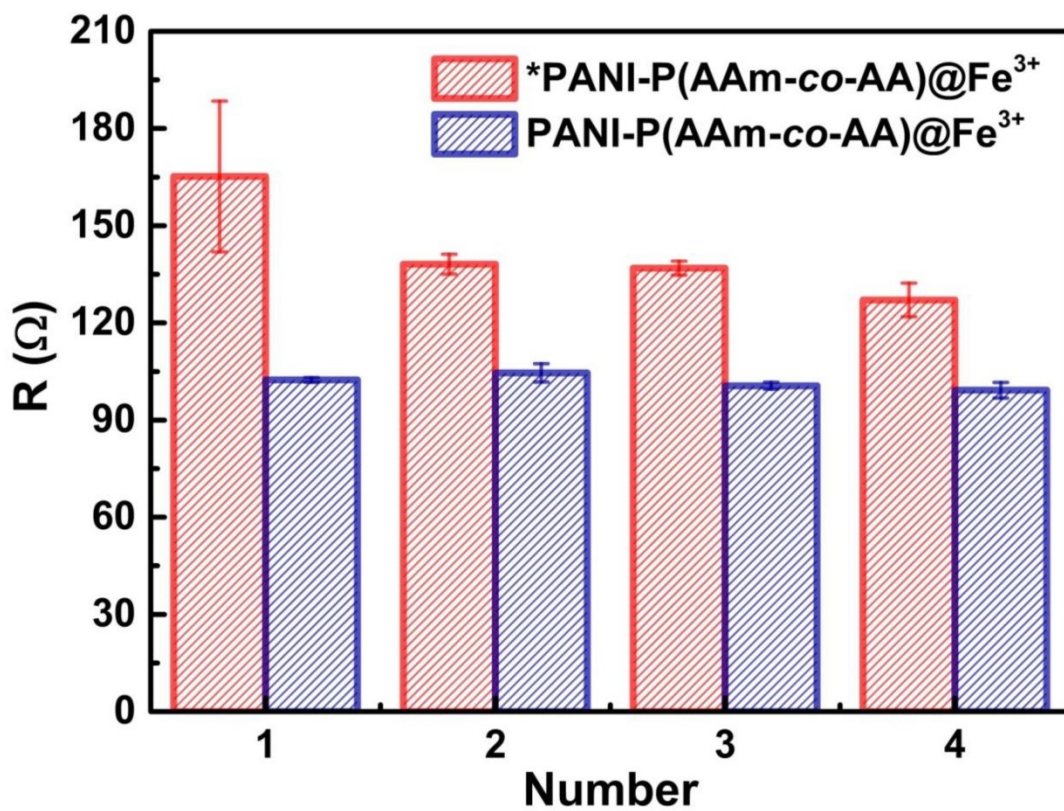

Fig. S15 Resistance and  $\Delta R / \bar{R}$  of  $\text{PANI-P(AAm-co-AA)@Fe}^{3+}$  and  $*\text{PANI-P(AAm-co-AA)@Fe}^{3+}$ .

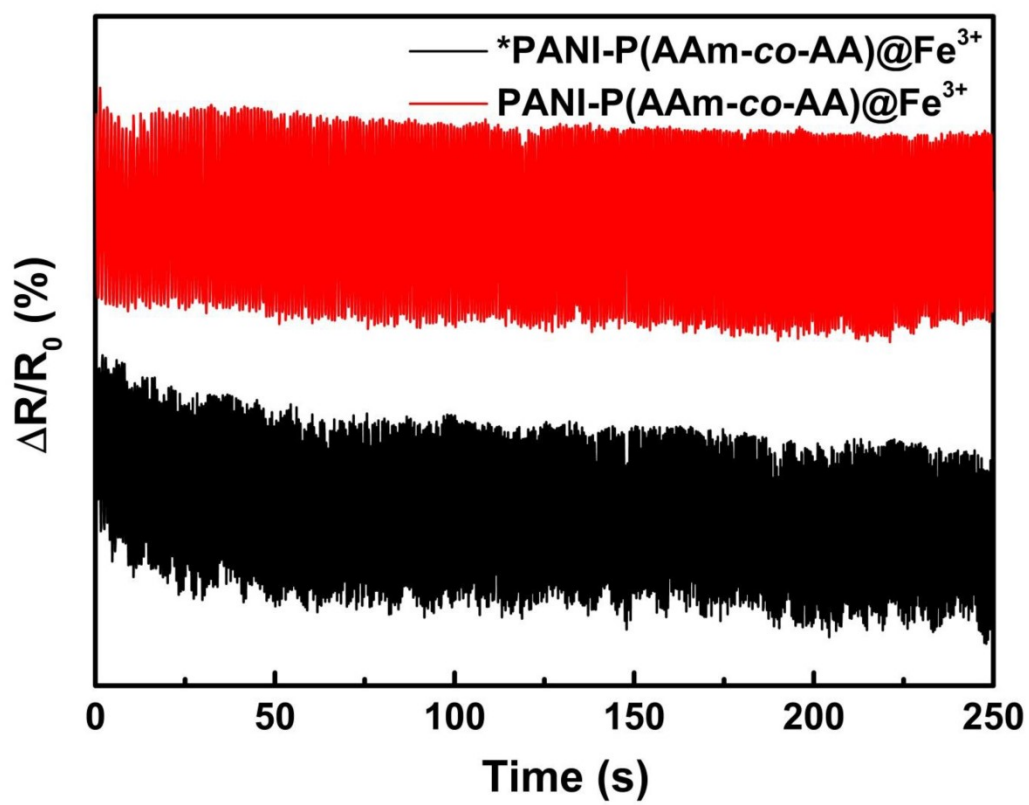

**Fig. S16** Comparison of the cycle performance of  $PANI-P(AAm-co-AA)@Fe^{3+}$  and  $*PANI-P(AAm-co-AA)@Fe^{3+}$ .

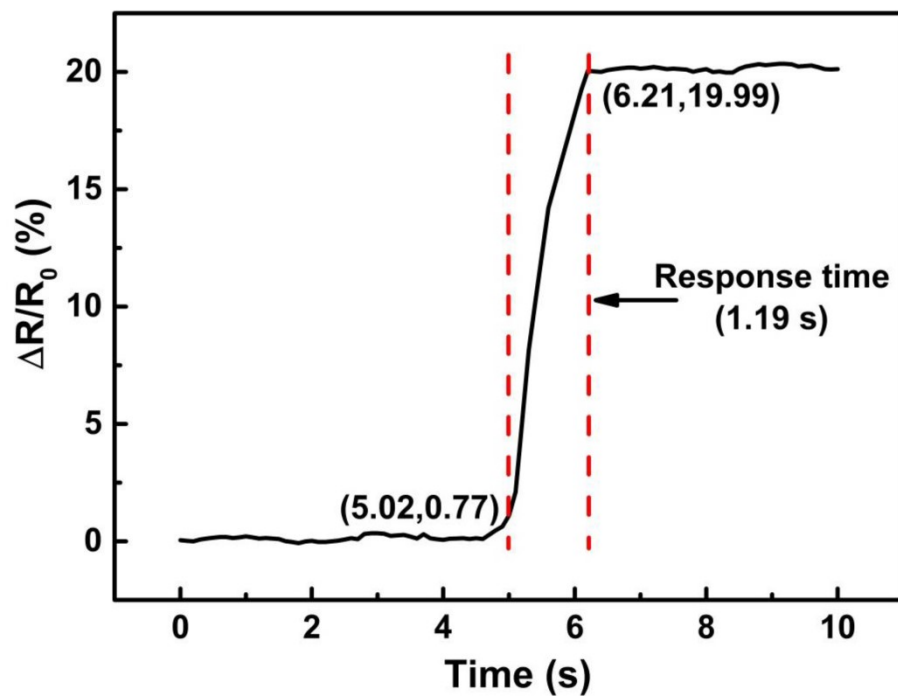

Fig. S17 Response time of PANI-P(AAm-co-AA)@Fe<sup>3+</sup>.

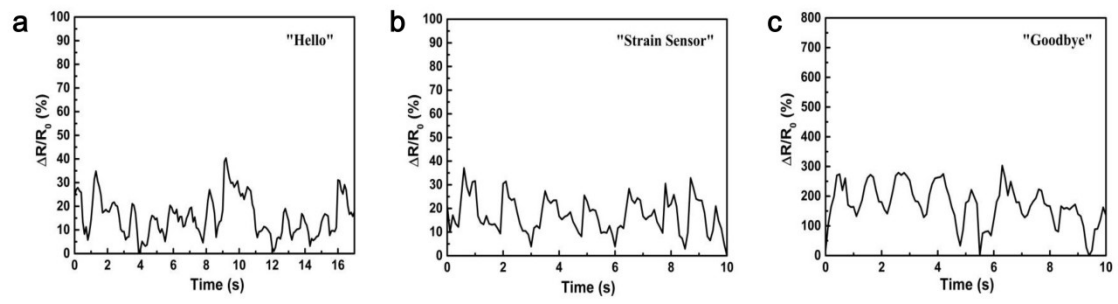

**Fig. S18**  $\Delta R/R_0$  signal changes of the volunteer speaking (a) "Hello"; (b) "Strain sensor" and "Goodbye".

## Notes and references

1. Z. Wang, J. Chen, Y. Cong, H. Zhang, T. Xu, L. Nie and J. Fu, *Chemistry of Materials*, 2018, **30**, 8062-8069.
2. J. Duan, X. Liang, J. Guo, K. Zhu and L. Zhang, *Adv Mater*, 2016, **28**, 8037-8044.
3. J. Chen, Q. Peng, T. Thundat and H. Zeng, *Chemistry of Materials*, 2019, **31**, 4553-4563.
4. T. Wang, Y. Zhang, Q. Liu, W. Cheng, X. Wang, L. Pan, B. Xu and H. Xu, *Advanced Functional Materials*, 2018, **28**.
5. Y. J. Liu, W. T. Cao, M. G. Ma and P. Wan, *ACS Appl Mater Interfaces*, 2017, **9**, 25559-25570.
6. J. Wang, Y. Lin, A. Mohamed, Q. Ji and H. Jia, *Journal of Materials Chemistry C*, 2021, **9**, 575-583.
7. H. Qin, Y. Chen, J. Huang and Q. Wei, *Macromolecular Materials and Engineering*, 2021, **306**.
